# Supplementary material
Source: PubMed Central journal article supplement (PMC8262506)
Supplement: jci-131-146431-s129.pdf [file jci-131-146431-s129.pdf]

1 **SUMOylation promotes extracellular vesicle-mediated transmission of lncRNA**

2 ***ELNATI* and lymph node metastasis in bladder cancer**

3 Changhao Chen<sup>1,2#\*</sup>, Hanhao Zheng<sup>1,2#</sup>, Yuming Luo<sup>3#</sup>, Yao Kong<sup>3</sup>, Mingjie An<sup>1,2</sup>, Yuting Li<sup>3</sup>,  
4 Wang He<sup>1,2</sup>, Bowen Gao<sup>4</sup>, Yue Zhao<sup>5</sup>, Hao Huang<sup>1,2</sup>, Jian Huang<sup>1,2\*</sup>, Tianxin Lin<sup>1,2\*</sup>

5 <sup>1</sup>Department of Urology, Sun Yat-sen Memorial Hospital, Guangzhou, Guangdong, P. R.  
6 China

7 <sup>2</sup>Guangdong Provincial Key Laboratory of Malignant Tumor Epigenetics and Gene  
8 Regulation, Sun Yat-sen Memorial Hospital, State Key Laboratory of Oncology in South  
9 China, Guangzhou, Guangdong, P. R. China

10 <sup>3</sup>Department of General Surgery, Guangdong Provincial People's Hospital, Guangdong  
11 Academy of Medical Sciences, Guangzhou, Guangdong, P. R. China

12 <sup>4</sup>Department of Pancreatobiliary Surgery, Sun Yat-sen Memorial Hospital, Guangzhou,  
13 Guangdong, P. R. China

14 <sup>5</sup>Department of Tumor Intervention, Sun Yat-sen University First Affiliated Hospital,  
15 Guangzhou, Guangdong, P. R. China

16 **\* Correspondence to:**

17 Tianxin Lin & Jian Huang & Changhao Chen. Department of Urology, Sun Yat-sen Memorial  
18 Hospital, 107 Yanjiangxi Road, Yuexiu District, Guangzhou, Guangdong Province, P. R.  
19 China, postal code: 510120; E-mail: lintx@mail.sysu.edu.cn & huangj8@mail.sysu.edu.cn &  
20 chenhh53@mail.sysu.edu.cn; Tel.: +86-13724008338, Work Tel.: +86-20-34070447; Fax:  
21 +86-20-81332336.

22 # These authors contributed equally to this study.

23 **The authors declare no competing interests.**

24

# 1 Supplemental Figures

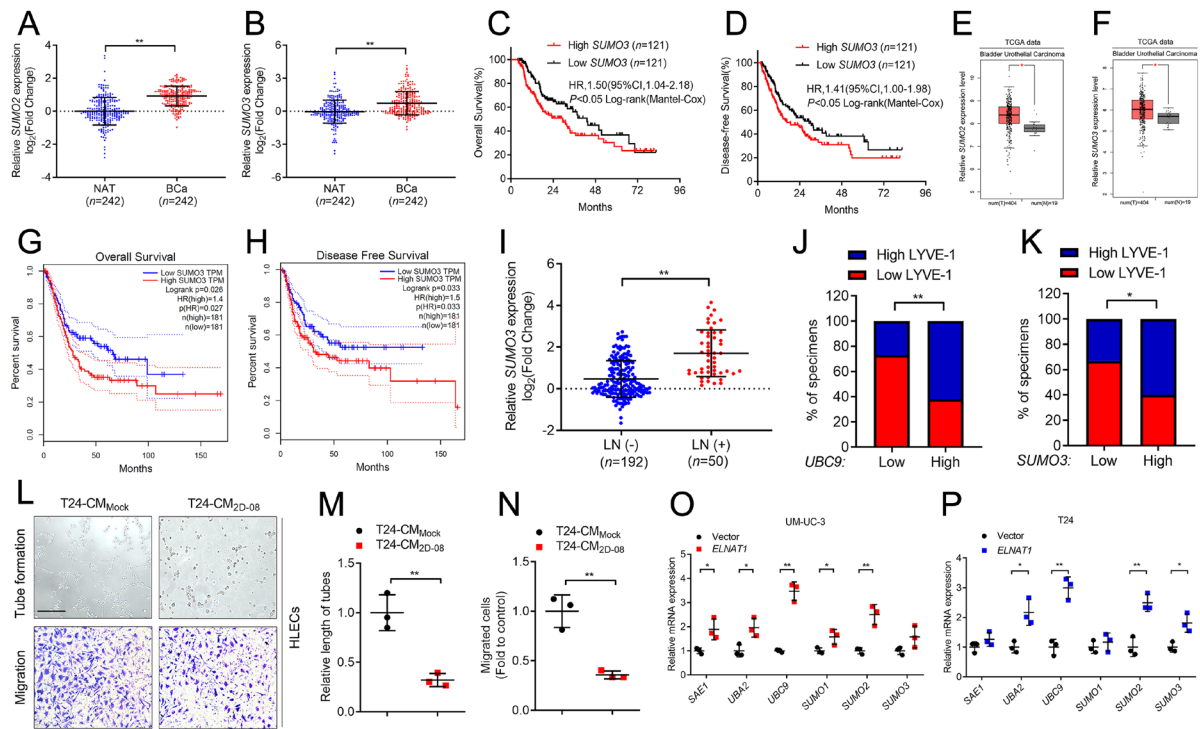

## 2 Supplemental Figure 1. SUMOylation is involved in the LN metastasis of BCa. (A and B)

3 qRT-PCR analysis of SUMOylation core components *SUMO2* (A) and *SUMO3* (B)

4 expression in BCa tissues and paired NATs in a 242-case cohort of BCa patients. The

5 nonparametric Mann-Whitney *U* test was used to assess the statistical significance. (C and D)

6 Kaplan-Meier curves for the OS and DFS of BCa patients with low vs. high *SUMO3*

7 expression (cutoff value is the median). (E and F) The expression of *SUMO2* (E) and

8 *SUMO3* (F) in BCa patients compared with controls from TCGA database. (G and H)

9 Kaplan-Meier survival analysis of BCa patients according to *SUMO3* expression from TCGA

10 database (cutoff value is the best cutoff). (I) qRT-PCR analysis of *SUMO3* expression in

11 LN-positive and LN-negative BCa tissues (n=242). The nonparametric Mann-Whitney *U* test

12 was used to assess the statistical significance. (J and K) The percentages of IHC staining for

13 the lymphatic vessel density in BCa tissues according to *UBC9* (J) and *SUMO3* (K)

14 expression.  $\chi^2$  test was used to assess the statistical significance. (L-N) Representative

1 images and quantification of tube formation and Transwell migration for HLECs incubation  
2 with culture media from T24 cells treated with PBS or SUMOylation inhibitor, 2D-08. Scale  
3 bars: 100  $\mu$ m. Two-tailed Student's *t* test was used to assess the statistical significance. (**O**  
4 **and P**) qRT-PCR analysis of SUMOylation components in *ELNATI* overexpressing BCa  
5 cells. Two-tailed Student's *t* test was used to assess the statistical significance. Error bars  
6 showed the SD of three independent experiments. \**P* < 0.05; \*\**P* < 0.01.

7

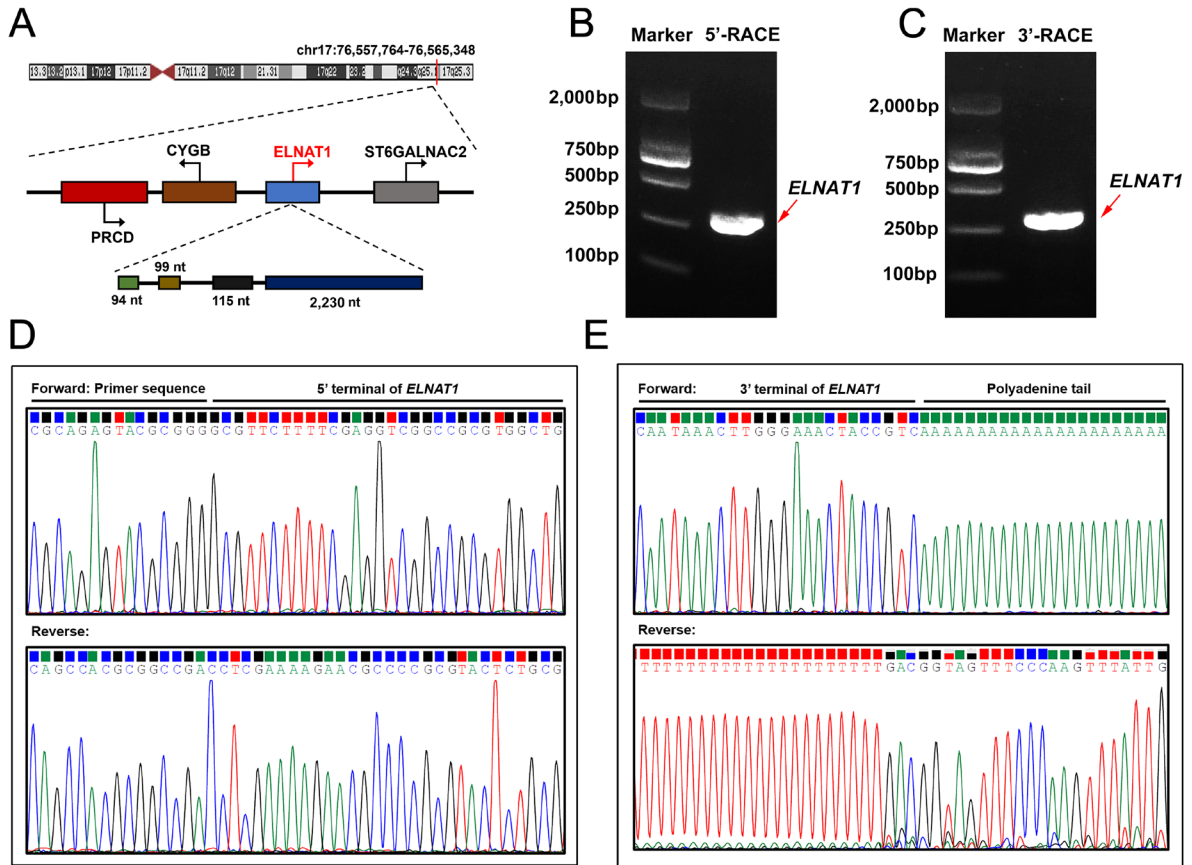

1  
2 **Supplemental Figure 2. Identification of the full-length of *ELNAT1*.** (A) Schematic  
3 illustration for the genomic locus of *ELNAT1* on chromosome and the neighboring protein  
4 coding genes. (B-E) Representative images of agarose gel electrophoresis and bidirectional  
5 sequencing for the cap sequences, 5'-terminal sequences of *ELNAT1* obtained from 5'-RACE  
6 PCR (B and D) and the tail sequences, 3'-terminal sequences of *ELNAT1* obtained from  
7 3'-RACE PCR (C and E).

8

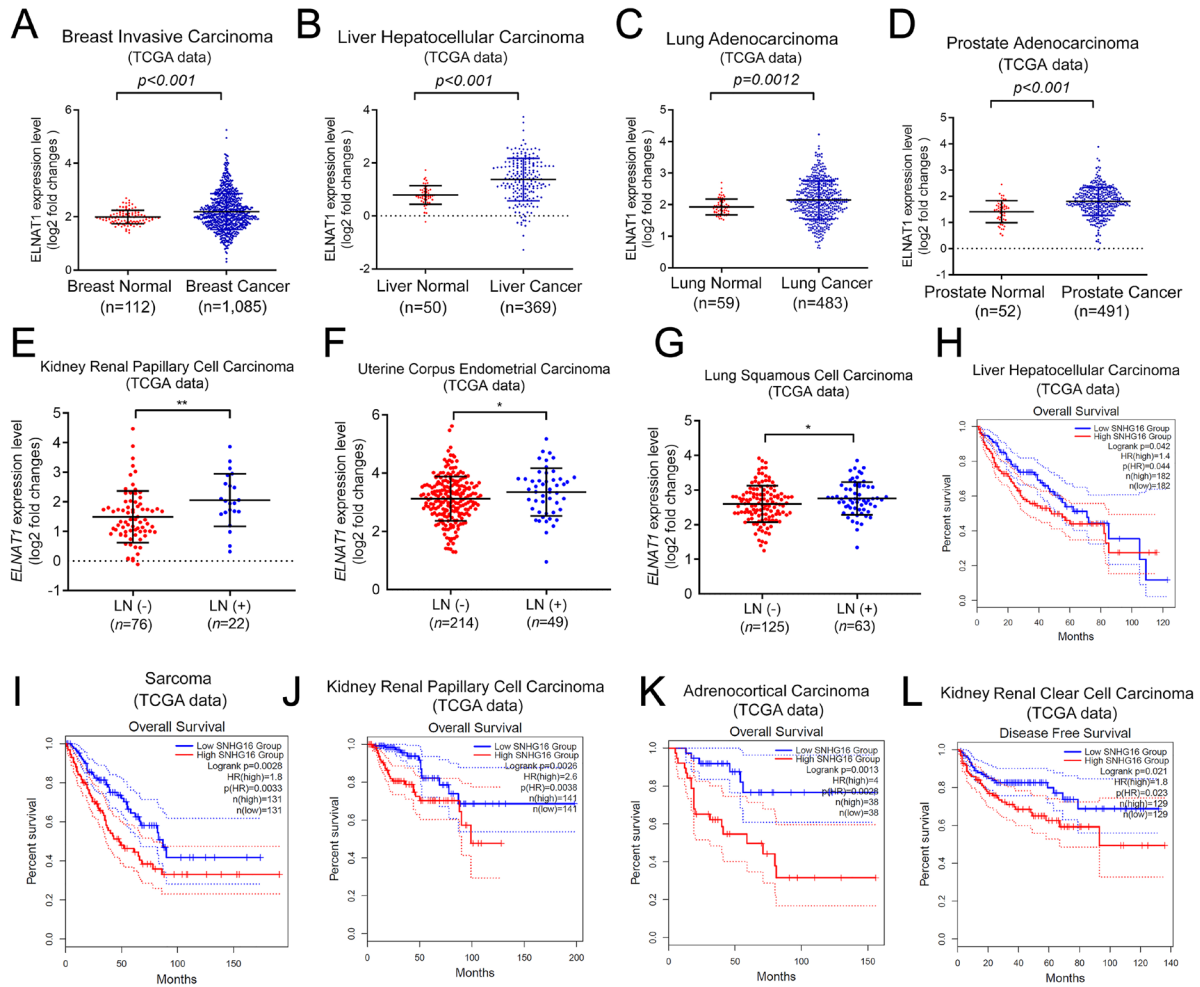

1  
2 **Supplemental Figure 3. *ELNAT1* is overexpressed in various human cancers and**  
3 **correlates with poor prognosis. (A-D)** Analysis of TCGA database showed the *ELNAT1*  
4 expression in different types of human cancers compared with corresponding control. The  
5 Nonparametric Mann-Whitney *U* test was used to assess the statistical significance. (E-G)  
6 Analysis of TCGA database revealed the higher *ELNAT1* expression in LN-positive tumor  
7 tissues as compared with LN-negative tissues in multiple cancers. The Nonparametric  
8 Mann-Whitney *U* test was used to assess the statistical significance. (H-L) Kaplan-Meier  
9 survival analysis of patients according to *ELNAT1* expression in various types of cancers  
10 from TCGA database (cutoff value is the best cutoff). \* $P < 0.05$ , \*\* $P < 0.01$ .

11

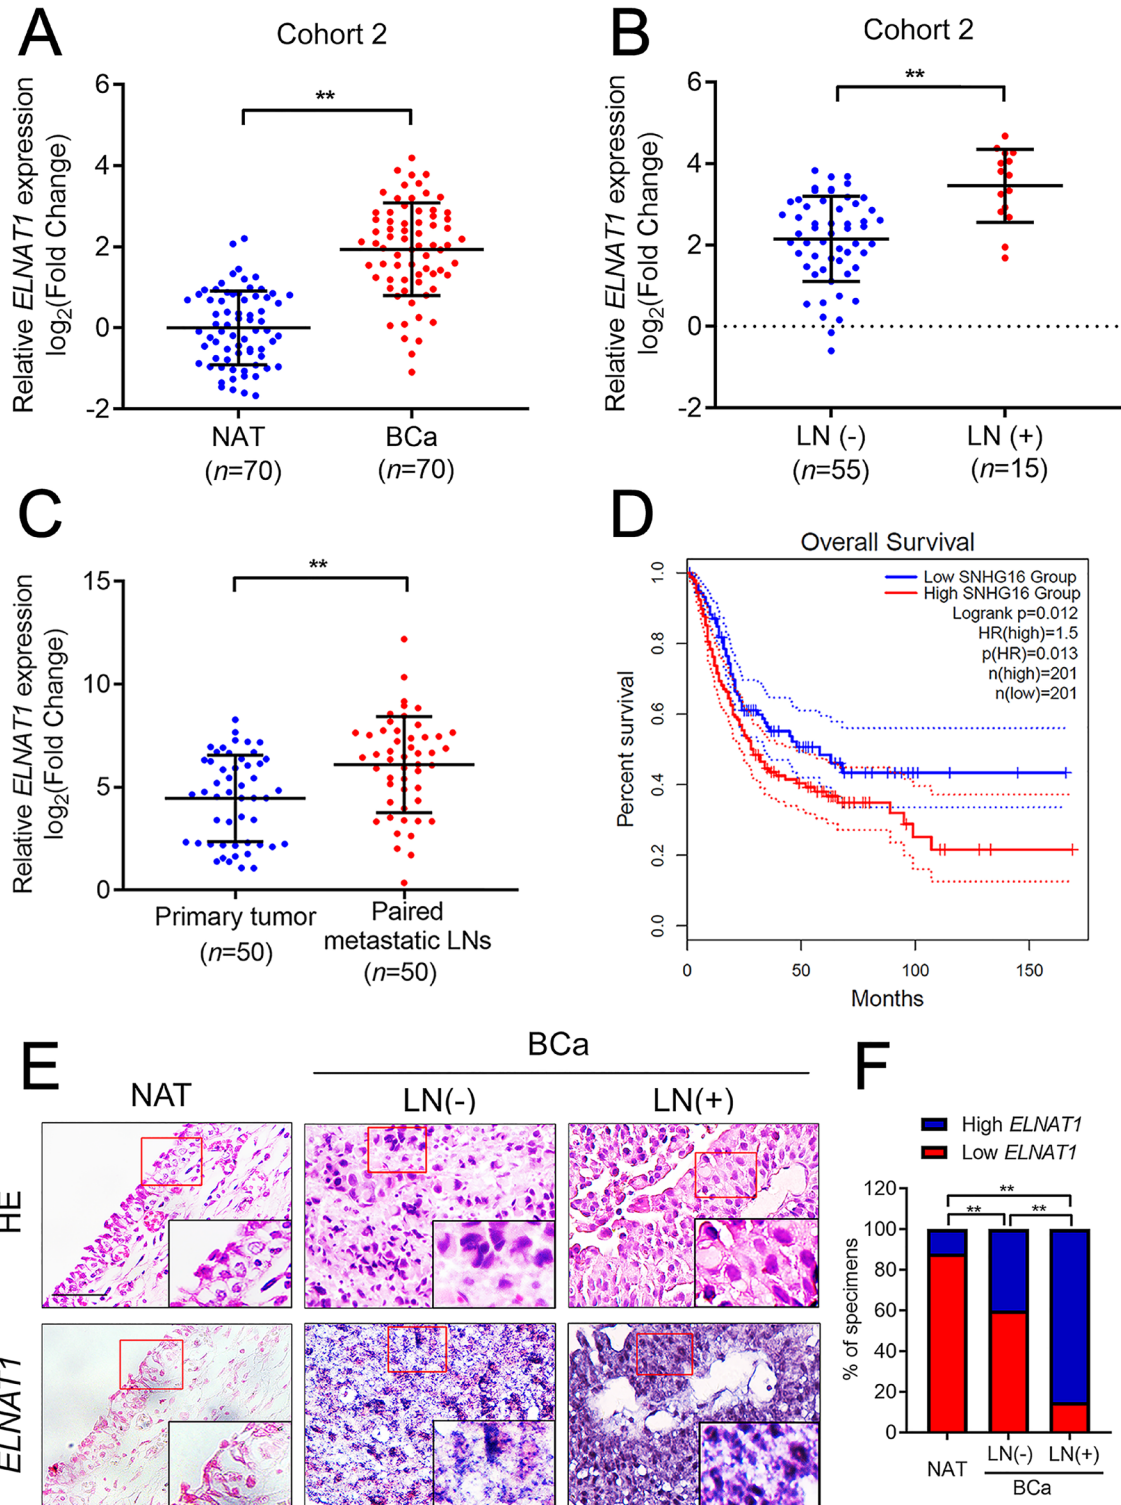

1

2 **Supplemental Figure 4. EV-mediated *ELNAT1* overexpression correlates with LN**

3 **metastasis of BCa. (A and B) qRT-PCR analysis of *ELNAT1* expression in BCa tissues and**

4 **NATs (A), LN-positive and LN-negative BCa tissues (B) in another 70-case cohort of BCa**

1 patients. The Nonparametric Mann-Whitney  $U$  test was used to assess the statistical  
2 significance. **(C)** qRT-PCR analysis of *ELNATI* expression in primary tumors and paired  
3 metastatic LNs in BCa patients (n=50). The Nonparametric Mann-Whitney  $U$  test was used  
4 to assess the statistical significance. **(D)** Kaplan-Meier curves for BCa patients according to  
5 *ELNATI* expression from TCGA database (cutoff value is the best cutoff). **(E and F)**  
6 Representative ISH images and percentages for *ELNATI* expression in LN-positive or  
7 LN-negative BCa tissues and NATs. Scale bars: 50  $\mu$ m.  $\chi^2$  test was used to assess the  
8 statistical significance. \* $P < 0.05$ , \*\* $P < 0.01$ .

9

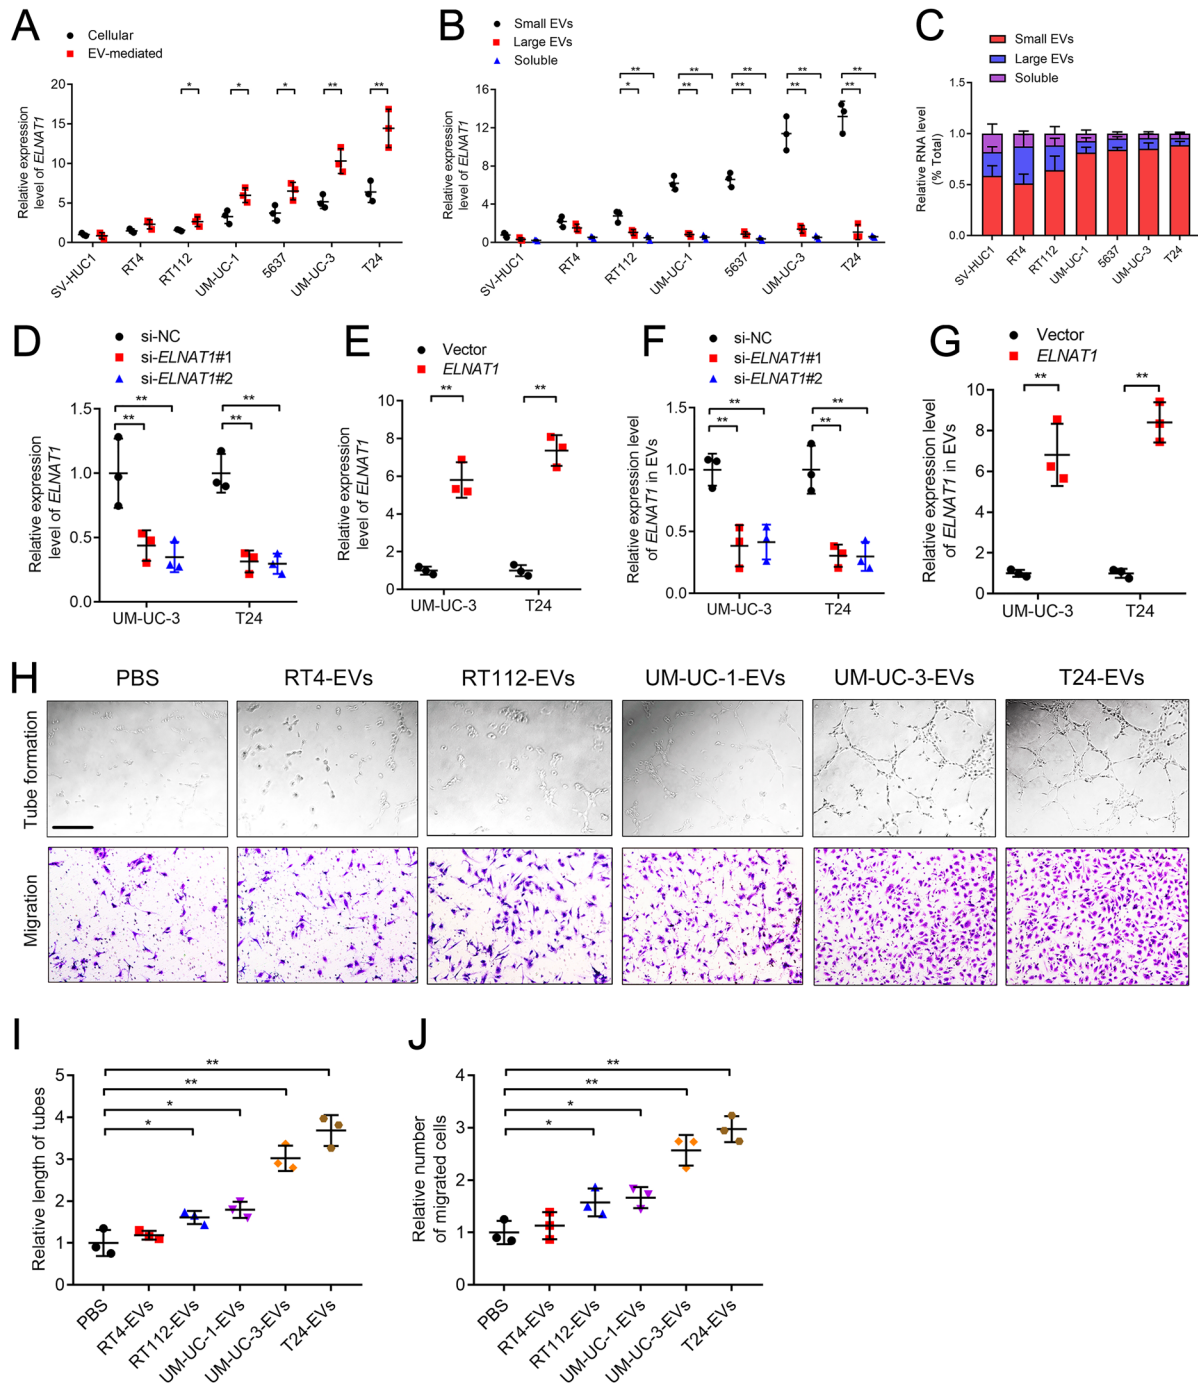

1

2 **Supplemental Figure 5. *ELNAT1* is overexpressed in BCa cells-secreted EVs. (A)**

3 qRT-PCR analysis of *ELNAT1* expression in indicated bladder cell lines and their

4 corresponding EVs. 1-way ANOVA followed by Dunnett's tests were used to assess the

5 statistical significance. **(B and C)** The *ELNAT1* expression and percentages in different

6 extracellular forms of indicated bladder cell lines are evaluated by qRT-PCR analysis. 1-way



1 ANOVA followed by Dunnett's tests were used to assess the statistical significance. **(D-G)**  
2 qRT-PCR analysis of the *ELNATI* expression in BCa cell lines and corresponding EVs after  
3 silencing or overexpressing *ELNATI*. 1-way ANOVA followed by Dunnett's tests or  
4 Two-tailed Student's t-test were used to assess the statistical significance. **(H-J)**  
5 Representative images and quantification of tube formation and Transwell migration for  
6 HLECs treated with BCa cells-secreted EVs. Scale bars: 100  $\mu$ m. 1-way ANOVA followed  
7 by Dunnett's tests were used to assess the statistical significance. Error bars showed the SD  
8 of three independent experiments. \* $P < 0.05$ , \*\* $P < 0.01$ .

9

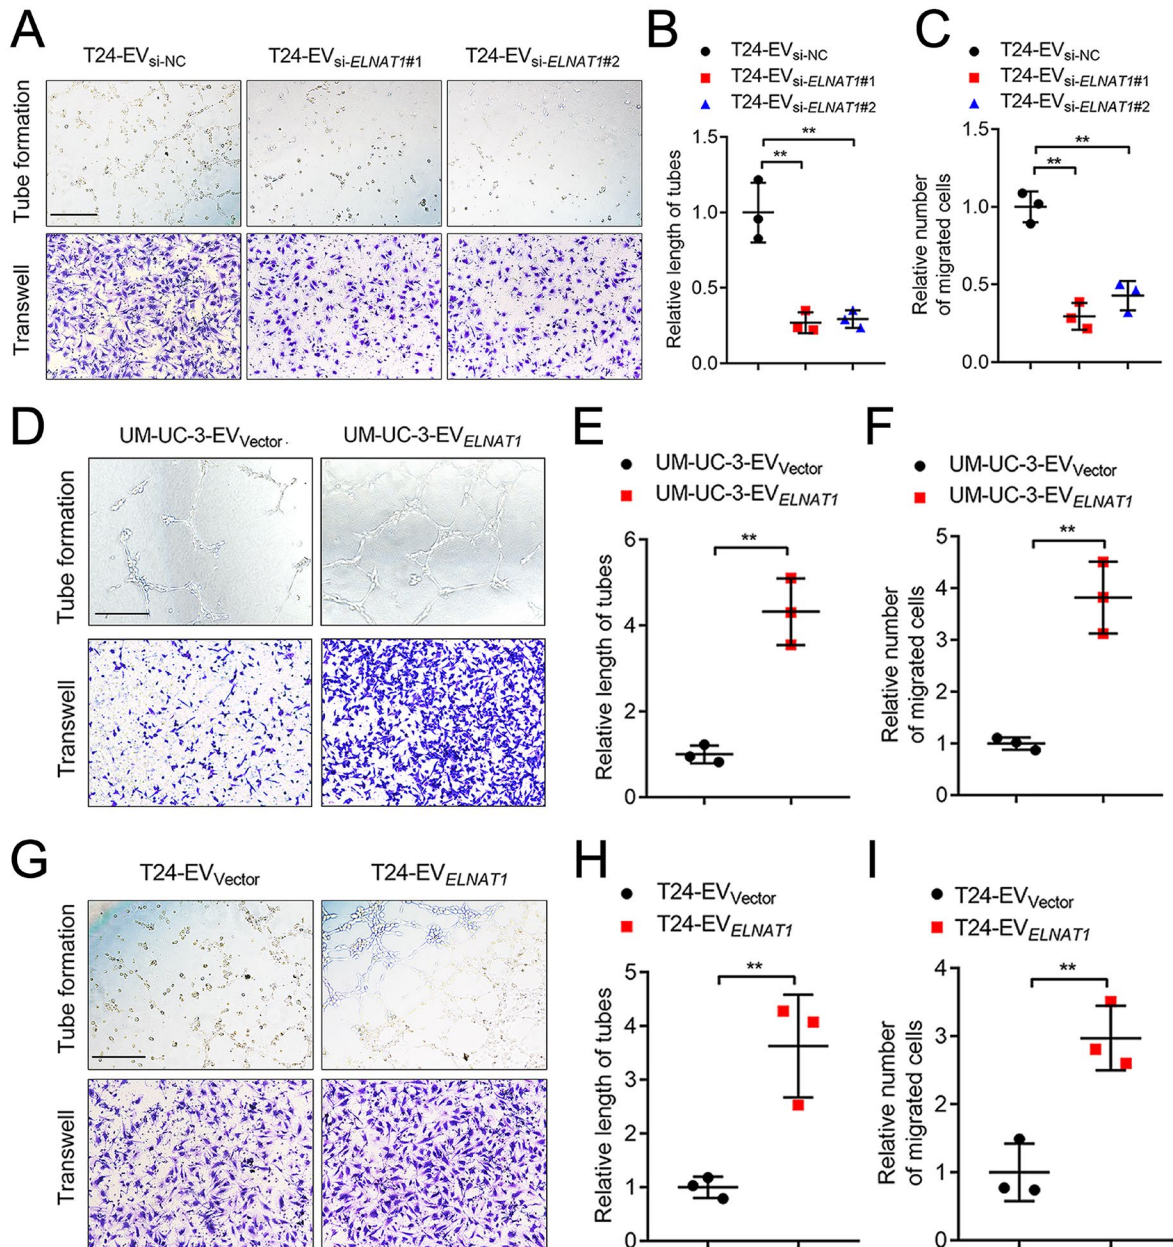

1

2 **Supplemental Figure 6. EV-mediated *ELNAT1* promotes lymphangiogenesis of BCa in**

3 **vitro. (A-C) Representative images and quantification of tube formation and Transwell**

4 **migration for HLECs treated with T24-EV<sub>si-NC</sub>, T24-EV<sub>si-ELNAT1#1</sub> or T24-EV<sub>si-ELNAT1#2</sub>. Scale**

5 **bars: 100  $\mu$ m. 1-way ANOVA followed by Dunnett's tests were used to assess the statistical**

6 **significance. (D-F) Representative images and quantification of tube formation and**

7 **Transwell migration for HLECs treated with UM-UC-3-EV<sub>Vector</sub> or UM-UC-3-EV<sub>ELNAT1</sub>.**

8 **Scale bars: 100  $\mu$ m. Two-tailed Student's *t*-test was used to assess the statistical significance.**

1 (G-I) Representative images and quantification of tube formation and Transwell migration  
 2 for HLECs treated with T24-EV<sub>vector</sub> or T24-EV<sub>ELNAT1</sub>. Scale bars: 100  $\mu$ m. Two-tailed  
 3 Student's *t*-test was used to assess the statistical significance. Error bars showed the SD of  
 4 three independent experiments. \**P* < 0.05, \*\**P* < 0.01.

5

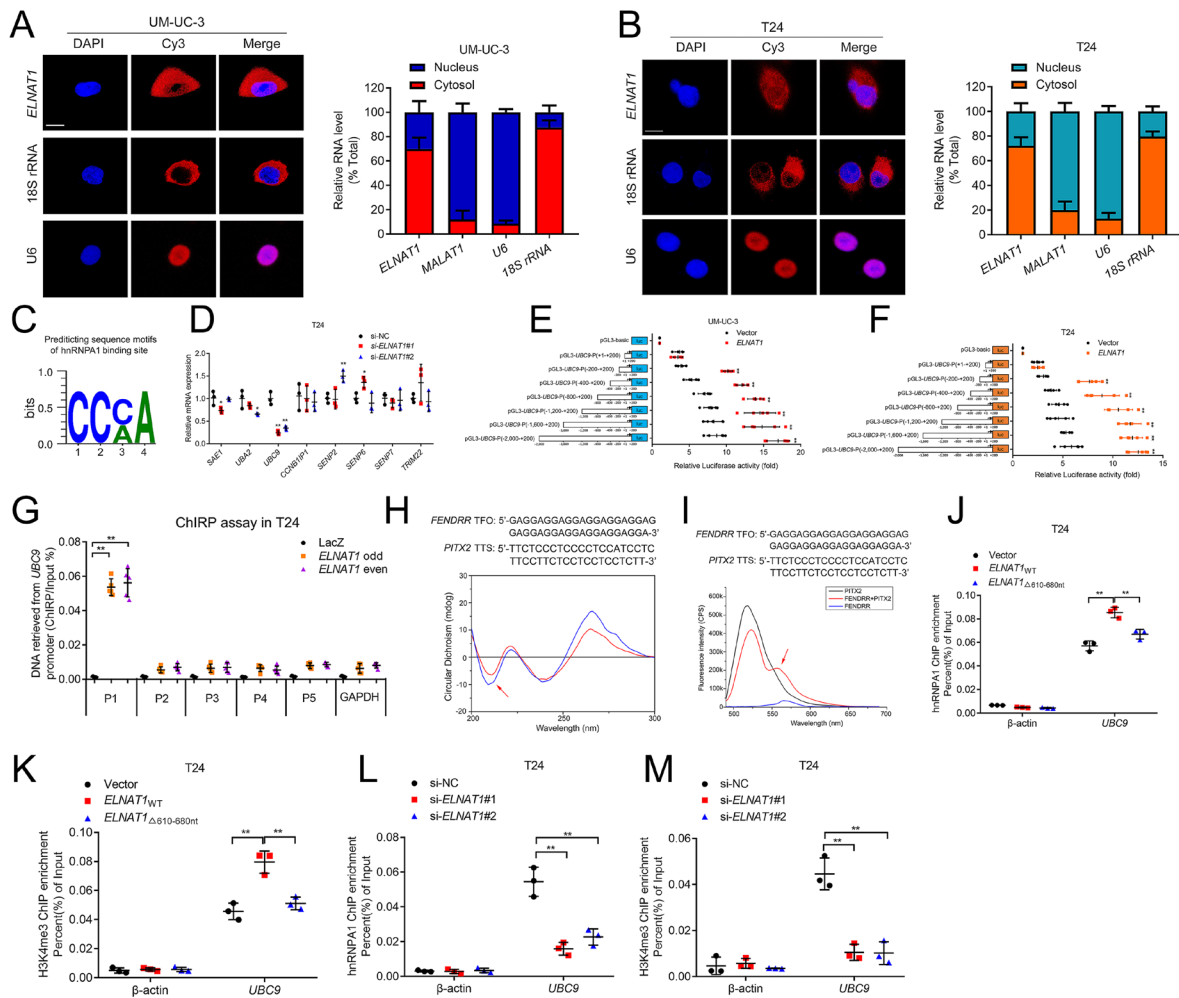

6

7 **Supplemental Figure 7. *ELNAT1* enhances H3K4me3 modification by recruiting**

8 **hnRNPA1 in *UBC9* promoter. (A and B) FISH assays and subcellular fractionation assays**

9 **of *ELNAT1* in UM-UC-3 or T24 cells. Scale bar: 5  $\mu$ m. (C) Prediction for the sequence**

10 **motifs of hnRNPA1 binding sites in *ELNAT1*. (D) qRT-PCR analysis of the**

11 **SUMOylation-related genes after *ELNAT1* knockdown in T24 cells. 1-way ANOVA followed**

1 by Dunnett's tests were used to assess the statistical significance. **(E and F)** Luciferase  
2 assays for the truncated *UBC9* promoter after *ELNAT1* overexpressing in UM-UC-3 and T24  
3 cells. Two-tailed Student's *t*-test was used to assess the statistical significance. **(G)** ChIRP  
4 analysis of *ELNAT1*-associated chromatin in T24 cells. 1-way ANOVA followed by  
5 Dunnett's tests were used to assess the statistical significance. **(H)** CD spectrum of TFO in  
6 *FENDRR* with TTS in *PITX2* promoter was examined as positive control. **(I)** FRET analysis  
7 of TFO in *FENDRR* with TTS in *PITX2* promoter was examined as positive control. **(J-M)**  
8 ChIP-qPCR analysis of the hnRNPA1 occupancy and H3K4me3 status in *UBC9* promoter in  
9 indicated T24 cells. 1-way ANOVA followed by Dunnett's tests were used to assess the  
10 statistical significance. Error bars showed the SD of three independent experiments. \* $P <$   
11 0.05, \*\* $P <$  0.01.

12

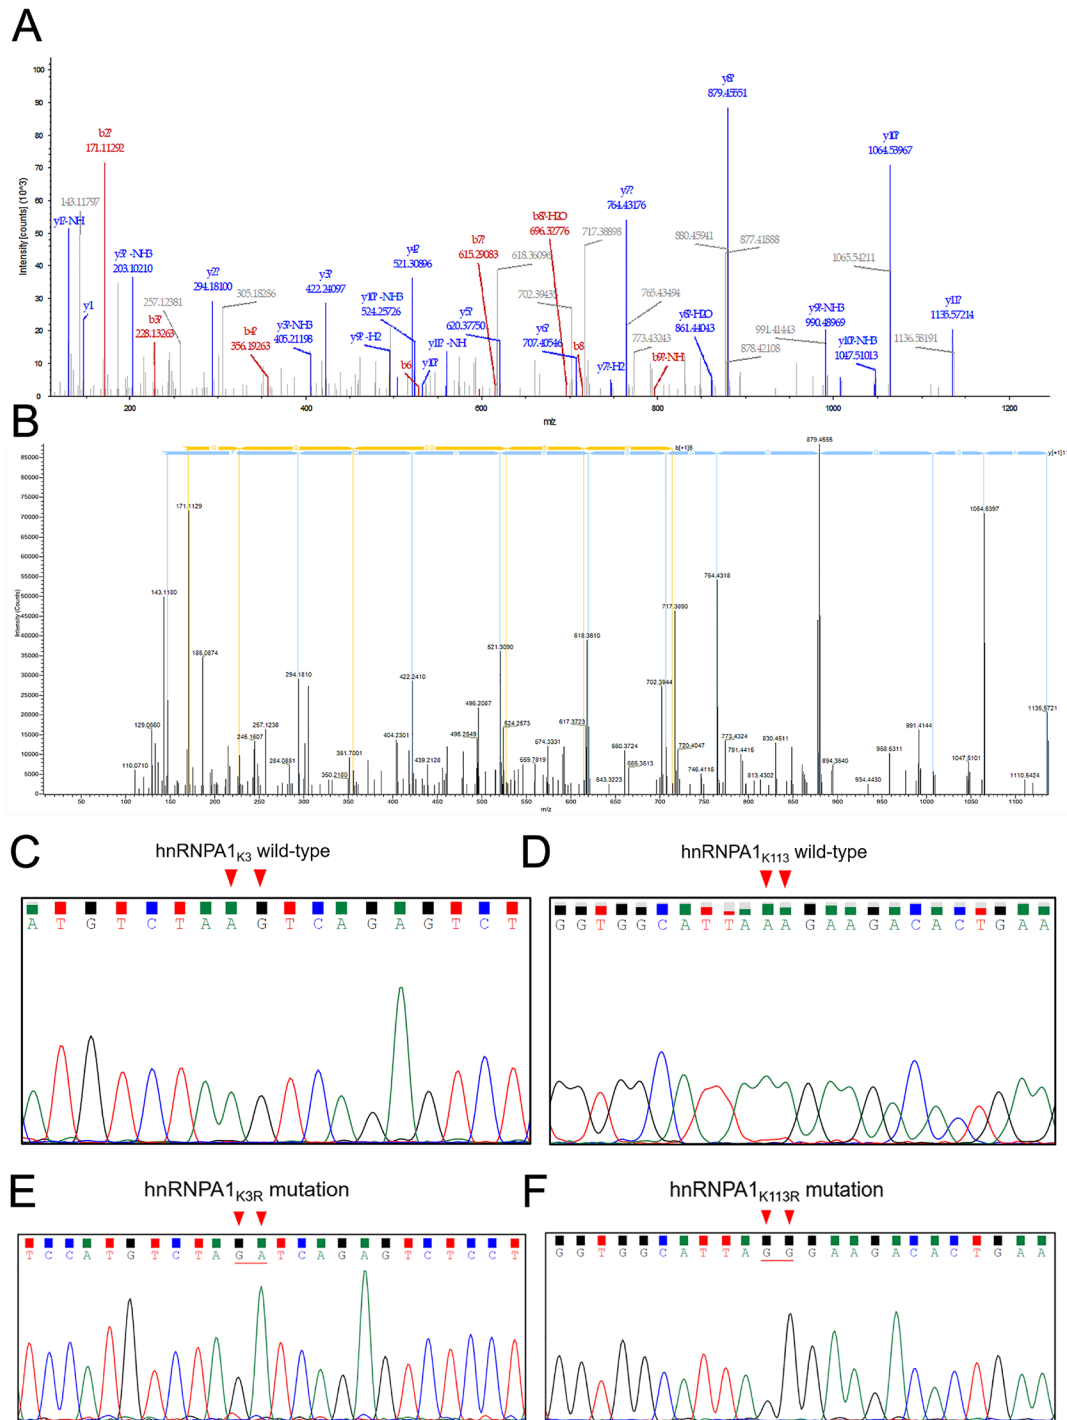

1

2 **Supplemental Figure 8. HnRNPA1 is SUMOylated at its lysine-113 residue. (A and B)**

3 Mass spectrometry analysis of the proteins obtained from co-IP assay using anti-hnRNPA1 in

4 UM-UC-3 cells. (C and D) Sequencing of the hnRNPA1<sub>K13</sub> and hnRNPA1<sub>K113</sub> wild type. (E

5 and F) Sequencing of the hnRNPA1<sub>K3R</sub> and hnRNPA1<sub>K113R</sub> mutations.

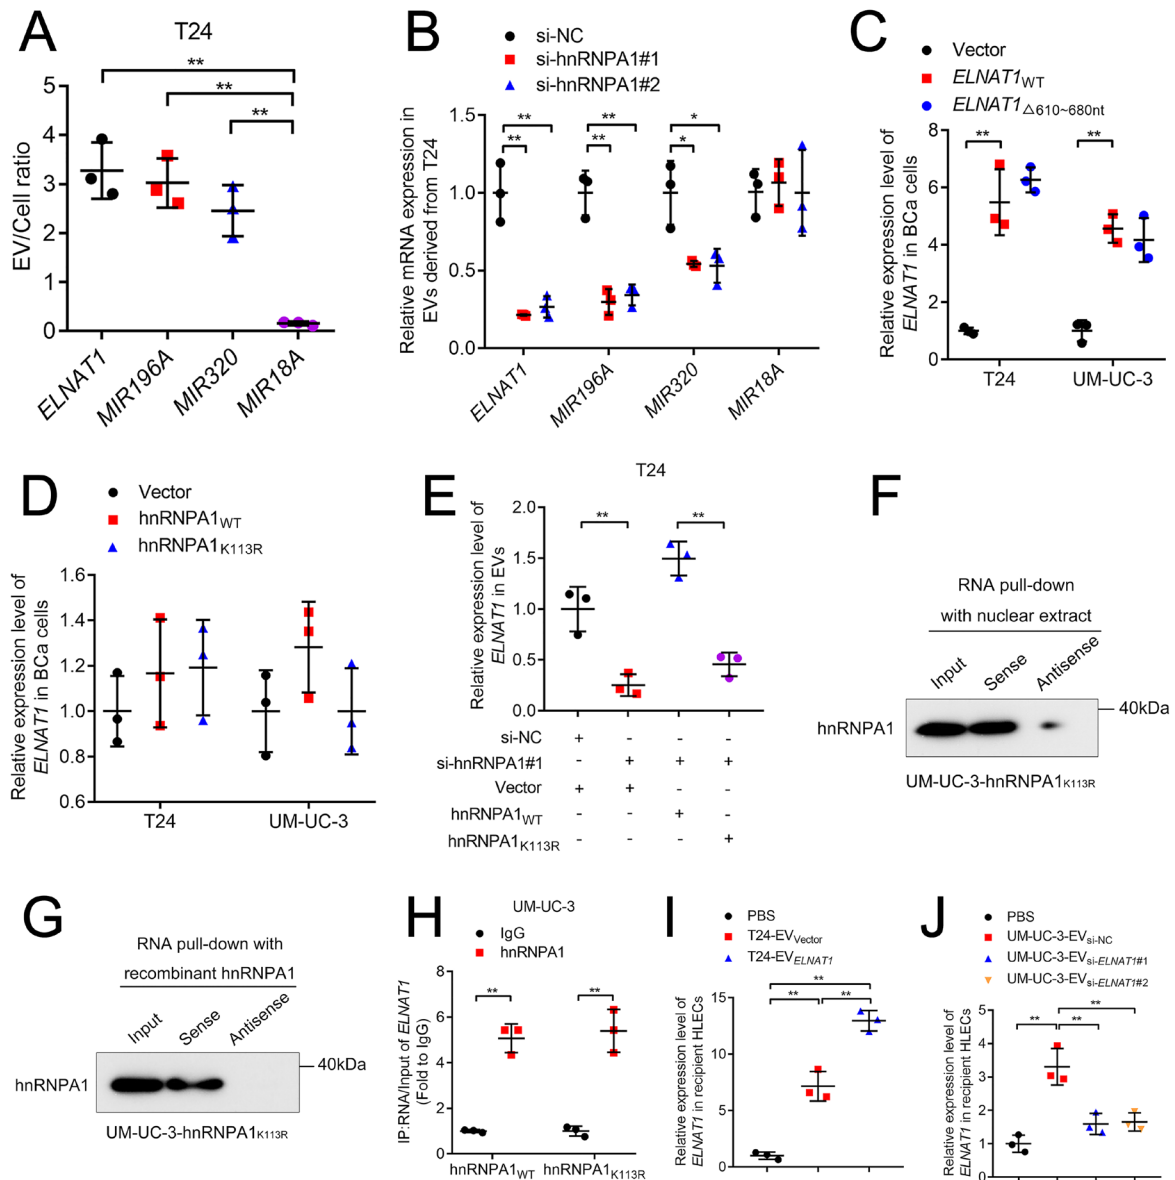

1

2 **Supplemental Figure 9. *ELNAT1* is packaged into EVs by SUMOylation of hnRNPA1.**

3 (A) The EV/cell ratio of RNAs in T24 cells. 1-way ANOVA followed by Dunnett's tests

4 were used to assess the statistical significance. (B) qRT-PCR analyzed the RNAs expression

5 in EVs secreted by T24 cells after hnRNPA1 knockdown. 1-way ANOVA followed by

6 Dunnett's tests were used to assess the statistical significance. (C) The assessment of

7 *ELNAT1* expression in BCa cells after the deletion of 610-680-nt of *ELNAT1*. 1-way

8 ANOVA followed by Dunnett's tests were used to assess the statistical significance. (D) The

9 analysis of *ELNAT1* expression in BCa cells after hnRNPA1<sub>K113R</sub> mutation. 1-way ANOVA

1 followed by Dunnett's tests were used to assess the statistical significance. **(E)** The *ELNATI*  
2 expression in EVs secreted by hnRNPA1-knockdown T24 cells after hnRNPA1<sub>WT</sub> or  
3 hnRNPA1<sub>K113R</sub> overexpression was assessed by qRT-PCR analysis. 1-way ANOVA followed  
4 by Dunnett's tests were used to assess the statistical significance. **(F and G)** RNA pull-down  
5 and western blotting analyses with nuclear extract or purified recombinant hnRNPA1  
6 evaluated the interaction between *ELNATI* and hnRNPA1 after hnRNPA1<sub>K113R</sub> mutation in  
7 UM-UC-3 cells. **(H)** RIP assays using anti-hnRNPA1 assessed the enrichment of *ELNATI* by  
8 hnRNPA1 after hnRNPA1<sub>K113R</sub> mutation in UM-UC-3 cells. IgG: negative control; U1:  
9 nonspecific control. Two-tailed Student's *t*-test was used to assess the statistical significance.  
10 **(I and J)** qRT-PCR analysis of *ELNATI* expression in HLECs treated with indicated BCa  
11 cells-secreted EVs. 1-way ANOVA followed by Dunnett's tests were used to assess the  
12 statistical significance. Error bars show the SD of three independent experiments. \**P* < 0.05,  
13 \*\**P* < 0.01.

14

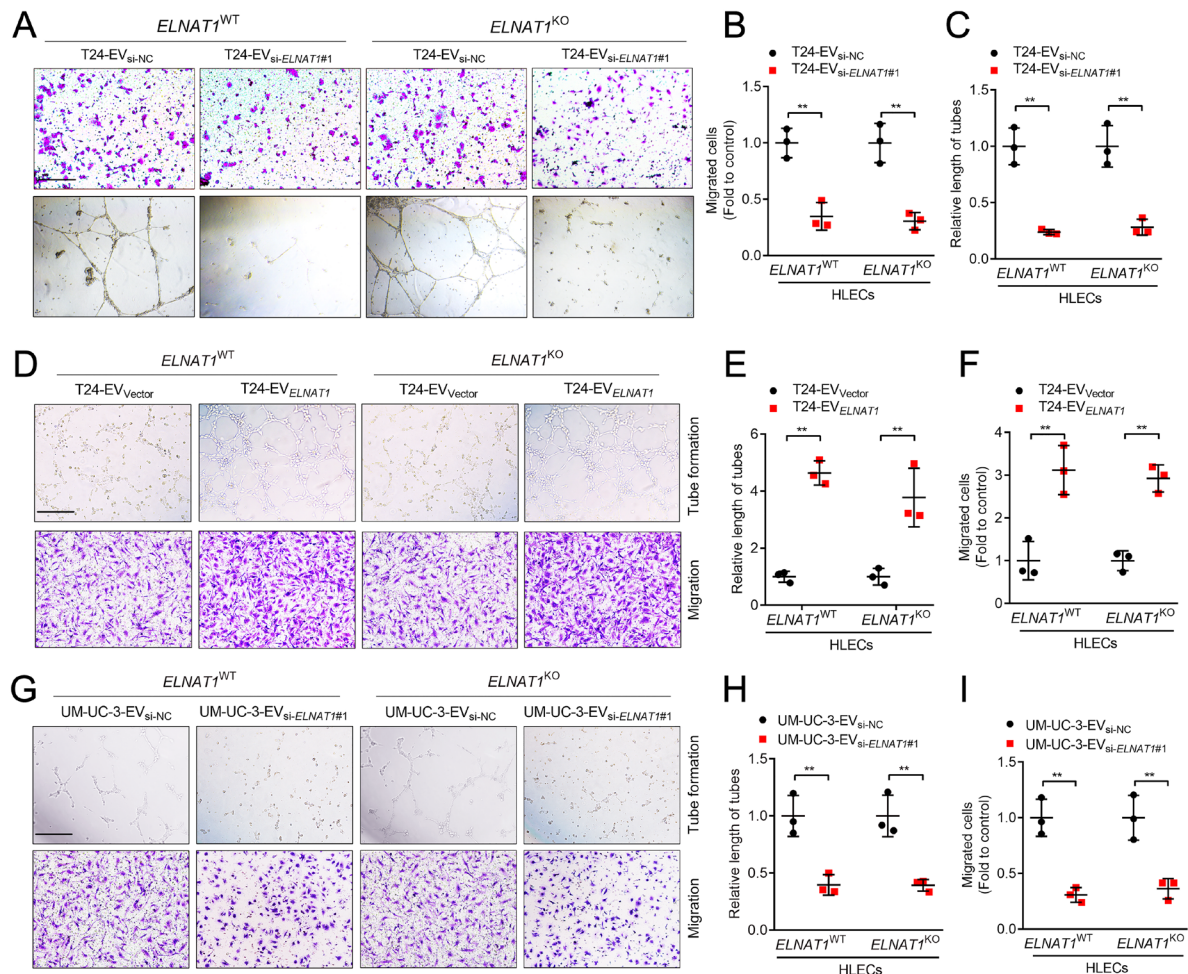

1

2 **Supplemental Figure 10. BCa cell-secreted EVs induces lymphangiogenesis through**

3 **transmitting *ELNATI1*.** (A-C) Representative images and quantification of Transwell

4 migration and tube formation for *ELNATI1*<sup>WT</sup> or *ELNATI1*<sup>KO</sup> HLECs treated with T24-EV<sub>si-NC</sub>

5 or T24-EV<sub>si-ELNATI1#1</sub>. Scale bars: 100 μm. Two-tailed Student's *t*-test was used to assess the

6 statistical significance. (D-F) Representative images and quantification of tube formation and

7 Transwell migration for *ELNATI1*<sup>WT</sup> or *ELNATI1*<sup>KO</sup> HLECs treated with T24-EV<sub>Vector</sub> or

8 T24-EV<sub>ELNATI1</sub>. Scale bars: 100 μm. Two-tailed Student's *t*-test was used to assess the

9 statistical significance. (G-I) Representative images and quantification of tube formation and

10 Transwell migration for *ELNATI1*<sup>WT</sup> or *ELNATI1*<sup>KO</sup> HLECs treated with UM-UC-3-EV<sub>si-NC</sub>,

11 UM-UC-3-EV<sub>si-ELNATI1#1</sub>. Scale bars: 100 μm. Two-tailed Student's *t*-test was used to assess



1 the statistical significance. Error bars show the SD of three independent experiments. \* $P <$   
 2 0.05, \*\* $P <$  0.01.

3

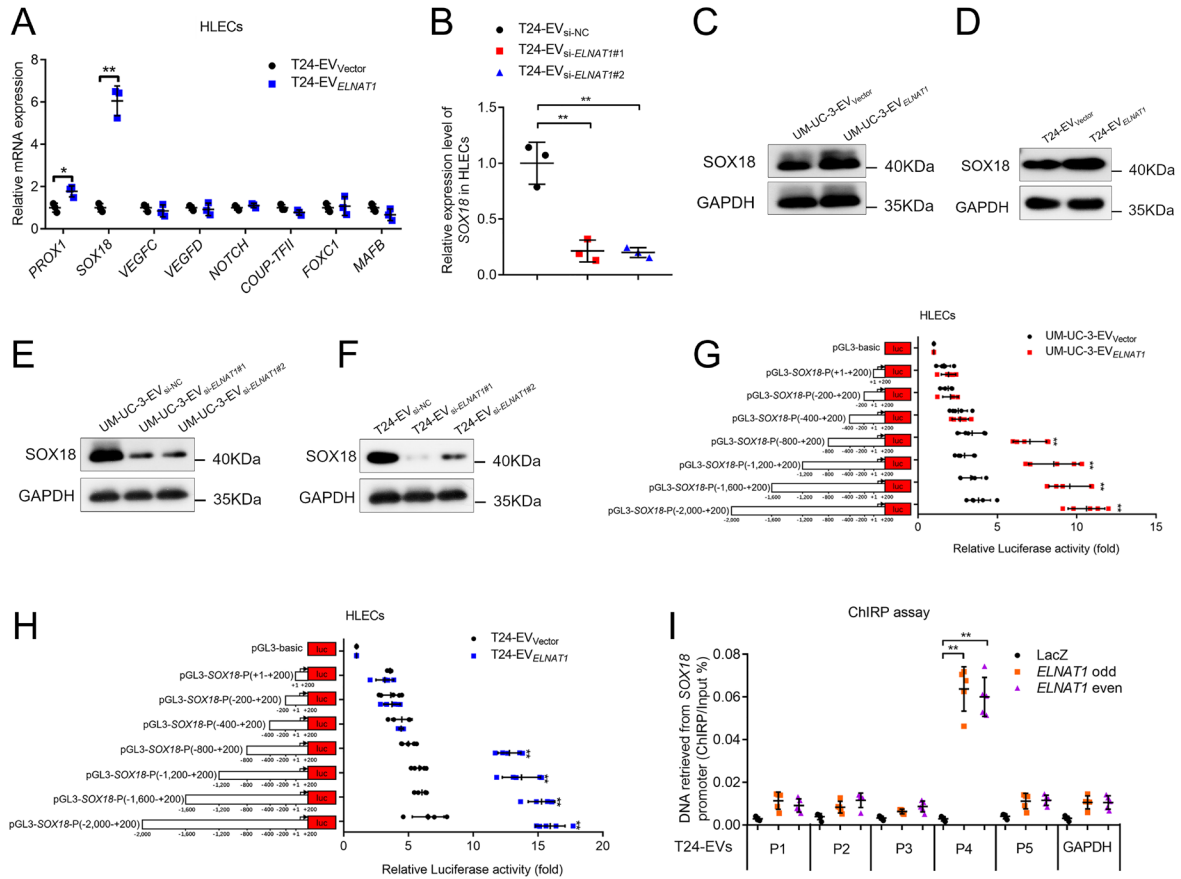

4

5 **Supplemental Figure 11. EV-mediated *ELNAT1* upregulates *SOX18* expression in**

6 **HLECs.** (A) qRT-PCR analysis of lymphangiogenesis-related genes expression in T24<sub>Vector</sub>

7 or T24-EV<sub>ELNAT1</sub>-treated HLECs. Two-tailed Student's *t*-test was used to assess the statistical

8 significance. (B) qRT-PCR analysis of *SOX18* expression in HLECs treated with T24-EV<sub>si-NC</sub>,

9 T24-EV<sub>si-ELNAT1#1</sub> or T24-EV<sub>si-ELNAT1#2</sub>. 1-way ANOVA followed by Dunnett's tests were

10 used to assess the statistical significance. (C-F) Western blotting analysis of *SOX18*

11 expression in HLECs treated with indicated BCa cells-secreted EVs. (G and H) Luciferase

12 assays for the serial deletion of *SOX18* promoter in HLECs treated with UM-UC-3-EV<sub>Vector</sub>,

13 UM-UC-3-EV<sub>ELNAT1</sub> or T24-EV<sub>Vector</sub>, T24-EV<sub>ELNAT1</sub>. Two-tailed Student's *t*-test was used to

14 assess the statistical significance. (I) ChIRP analysis of EV-mediated *ELNAT1*-associated

1 chromatin in T24-EVs-treated HLECs. 1-way ANOVA followed by Dunnett's tests were  
 2 used to assess the statistical significance. Error bars show the SD of three independent  
 3 experiments. \* $P < 0.05$ , \*\* $P < 0.01$ .

4

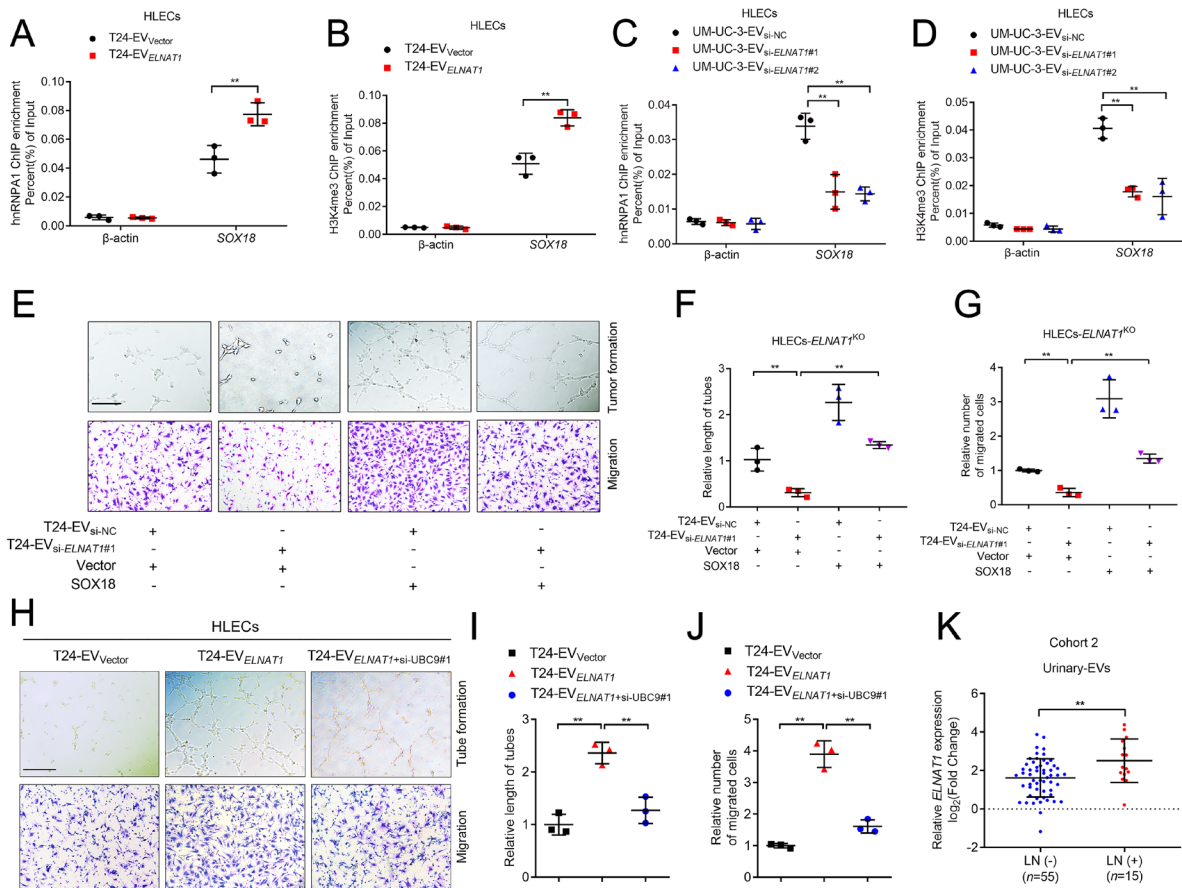

5

6 **Supplemental Figure 12. Blocking SUMOylation suppresses EV-mediated**

7 ***ELNAT1*-induced lymphangiogenesis. (A-D) ChIP-qPCR analysis of the hnRNPA1**

8 **occupancy and H3K4me3 status in the promoter of *SOX18* in HLECs treated with indicated**

9 **BCa cells-secreted EVs. Two-tailed Student's *t*-test or 1-way ANOVA followed by Dunnett's**

10 **tests were used to assess the statistical significance. (E-G) Representative images and**

11 **quantification of tube formation and Transwell migration for T24-EV<sub>si-NC</sub> or**

12 **T24-EV<sub>si-ELNAT1#1</sub>-treated *ELNAT1*<sup>KO</sup> HLECs transfected with Vector or SOX18 plasmid.**

13 **Scale bars: 100 μm. 1-way ANOVA followed by Dunnett's tests were used to assess the**

14 **statistical significance. (H-J) Representative images and quantification of tube formation and**

1 Transwell migration for HLECs treated with EVs secreted by control or  
2 *ELNATI*-overexpressing T24 cells transfected with si-NC or si-UBC9#1. Scale bars: 100  $\mu$ m.  
3 1-way ANOVA followed by Dunnett's tests were used to assess the statistical significance.  
4 **(K)** qRT-PCR analysis of *ELNATI* expression in urinary EVs obtained from another 70-case  
5 cohort of BCa patients with or without LN metastasis. The Nonparametric Mann-Whitney *U*  
6 test was used to assess the statistical significance. Error bars show the SD of three  
7 independent experiments. \* $P < 0.05$ , \*\* $P < 0.01$ .  
8

1 **Supplemental Tables**

2 **Supplemental Table 1. Patients with MIBC and healthy participants characteristics for**  
3 **next-generation sequencing (NGS) on urinary EVs.**

---

| <b>Characteristics</b> | <b>Gender</b> | <b>Age</b> | <b>TNM stage</b> | <b>Pathological grade</b> |
|------------------------|---------------|------------|------------------|---------------------------|
| BCa patient 1          | Female        | 64         | T3aN0M0          | IV                        |
| BCa patient 2          | Male          | 64         | T2bN1M0          | IV                        |
| BCa patient 3          | Male          | 67         | T3bN0M0          | IV                        |
| BCa patient 4          | Female        | 56         | T2aN1M0          | III                       |
| BCa patient 5          | Male          | 48         | T2aN0M0          | III                       |
| Healthy participant 1  | Female        | 60         |                  |                           |
| Healthy participant 2  | Male          | 63         |                  |                           |
| Healthy participant 3  | Male          | 68         |                  |                           |
| Healthy participant 4  | Female        | 56         |                  |                           |
| Healthy participant 5  | Male          | 51         |                  |                           |

---

4 Abbreviations: BCa = bladder cancer; TNM stage = tumor node metastasis stage.

5

1 **Supplemental Table 2. The lncRNAs co-upregulated in urinary-EVs from BCa patients**  
 2 **and LN-positive BCa tissues.**

| <b>Gene Symbol</b> | <b>Chromosome</b> | <b>Location</b>              |
|--------------------|-------------------|------------------------------|
| RP11-563N4.1       | 2                 | chr2:32,072,515-32,235,206   |
| <i>ELNATI</i>      | 17                | chr17:76,557,764-76,565,348  |
| RP11-357H14.17     | 17                | chr17:48,502,127-48,689,498  |
| MIR4435-2HG        | 2                 | chr2:111,006,015-111,523,376 |
| ENSG00000275234    | 19                | chr19:6,469,465-6,470,152    |
| LINC00665          | 19                | chr19:36,313,067-36,331,770  |
| UCA1               | 19                | chr19:15,828,206-15,836,328  |
| ENSG00000279365    | 21                | chr21:36,485,867-36,487,760  |
| RP11-1079K10.4     | 17                | chr17:49,292,915-49,476,604  |
| LINC00858          | 10                | chr10:84,279,980-84,294,659  |
| ENSG00000229021    | 1                 | chr1:151,994,531-152,042,774 |
| PVT1               | 8                 | Chr8:127,794,526-128,187,101 |

3  
 4  
 5

1 **Supplemental Table 3. Effect of EV-mediated *ELNAT1* on popliteal LN metastasis in**  
 2 **vivo.**

| <b>Xenograft</b>                    | <b>No. metastasis<br/>LNs</b> | <b>No. Non-metastasis<br/>LNs</b> | <b>Metastasis<br/>ratio</b> | <b><i>P</i>-value<sup>A</sup></b> |
|-------------------------------------|-------------------------------|-----------------------------------|-----------------------------|-----------------------------------|
| UM-UC-3-EV <sub>Vector</sub>        | 3                             | 9                                 | 25%                         | 0.001**                           |
| UM-UC-3-EV <sub><i>ELNAT1</i></sub> | 11                            | 1                                 | 91.67%                      |                                   |

3 <sup>A</sup> Chi-square test. \*  $p < 0.05$ , \*\*  $p < 0.01$ .  
 4  
 5  
 6  
 7

1 **Supplemental Table 4. The change of SUMOylation-related genes after *ELNATI***  
 2 **overexpressing in indicated BCa cells.**

| <b>Gene Symbol</b> | <b>Location</b>              | <b>Fold Change</b> | <b><i>p</i>-value</b> |
|--------------------|------------------------------|--------------------|-----------------------|
| SAE1               | chr19:47,113,274-47,210,636  | 2.197512           | 0.000178              |
| UBA2               | chr19:34,428,352-34,471,251  | 2.117072           | 0.000405              |
| UBC9               | chr16:1,308,880-1,327,018    | 2.286423           | 0.000568              |
| CCNB1IP1           | chr14:20,311,368-20,333,312  | 1.673057           | 0.004854              |
| SENP6              | chr6:75,601,509-75,718,281   | 0.439591           | 0.001250              |
| SENP2              | chr3:185,582,496-185,633,551 | 0.420276           | 0.006155              |
| SENP7              | chr3:101,324,205-101,513,241 | 0.395299           | 0.016816              |
| TRIM22             | chr11:5,689,697-5,737,089    | 0.410256           | 0.048322              |

3  
 4  
 5

1 **Supplemental Table 5. The possible TFO predicted by LongTarget for *ELNAT1* and**  
 2 **UBC9 promoter.**

| <b>Oligo ID</b> | <b>TFO (5'-3')</b> | <b>Oligo ID</b> | <b>TTS (5'-3')</b> | <b>Score</b> |
|-----------------|--------------------|-----------------|--------------------|--------------|
| <b>TFO1</b>     | GGUUGCCAAGGUGAAGC  | TTS1            | CCCGCCGTCGGCGAAAT  | 66           |
| <b>TFO2</b>     | CUCCCGGACUUAAGCGA  | TTS2            | GAGGGAATGAGTGAGGG  | 49           |
| <b>TFO3</b>     | CUCUGUCACCCAGGCUG  | TTS3            | GTGAGAGTGGGAATGAG  | 55           |
| <b>TFO4</b>     | CUGCCUGCCUCAGCUUC  | TTS4            | GAGGGAGGGAATGAATG  | 37           |
| <b>TFO5</b>     | CUUGGCUCACUGCAACC  | TTS5            | GAAGGGAATGAGTGAGG  | 44           |

3 Abbreviations: TFO, Triplex-forming oligos; TTS, triplex target sites.

4  
5



1 **Supplemental Table 6. The popliteal LN metastasis rate in differently treated group of**  
 2 **nude mice.**

| <b>Xenograft</b>                     | <b>No.<br/>metastasis<br/>LNs</b> | <b>No.<br/>Non-metastasis<br/>LNs</b> | <b>Metastasis<br/>ratio</b> | <b>P-value<sup>A</sup></b> |
|--------------------------------------|-----------------------------------|---------------------------------------|-----------------------------|----------------------------|
| UM-UC-3-EV <sub>Vector</sub>         | 2                                 | 10                                    | 16.67%                      | 0.004**                    |
| UM-UC-3-EV <sub>ELNATI</sub>         | 9                                 | 3                                     | 75%                         | 0.041*                     |
| UM-UC-3-EV <sub>ELNATI+si-UBC9</sub> | 4                                 | 8                                     | 33.33%                      |                            |

3 <sup>A</sup> Chi-square test. \*  $p < 0.05$ , \*\*  $p < 0.01$ .  
 4  
 5  
 6

1 **Supplemental Table 7. Correlation between EV-mediated *ELNATI* expression and**  
 2 **clinicopathologic characteristics of BCa patients**

| Characteristics             | No. of cases | EV-mediated <i>ELNATI</i> expression |      |                              |
|-----------------------------|--------------|--------------------------------------|------|------------------------------|
|                             |              | Low                                  | High | <i>P</i> -value <sup>i</sup> |
| <b>Total cases</b>          | 242          | 121                                  | 121  |                              |
| <b>Gender</b>               |              |                                      |      | 0.882                        |
| Male                        | 181          | 91                                   | 90   |                              |
| Female                      | 61           | 30                                   | 31   |                              |
| <b>Age</b>                  |              |                                      |      | 0.298                        |
| < 65                        | 102          | 55                                   | 47   |                              |
| ≥ 65                        | 140          | 66                                   | 74   |                              |
| <b>T stage</b>              |              |                                      |      | 0.075                        |
| T1                          | 79           | 46                                   | 33   |                              |
| T2-4                        | 163          | 75                                   | 88   |                              |
| <b>T grade</b>              |              |                                      |      | 0.310                        |
| Low                         | 65           | 29                                   | 36   |                              |
| High                        | 177          | 92                                   | 85   |                              |
| <b>Lymphatic metastasis</b> |              |                                      |      | <b>0.001**</b>               |
| Negative                    | 192          | 111                                  | 81   |                              |
| Positive                    | 50           | 10                                   | 40   |                              |

3 Abbreviations: No. of cases = number of cases; T stage = tumor stage; T grade = tumor grade.

4 <sup>i</sup> Chi-square test, \* *P* < 0.05, \*\* *P* < 0.01.

5

6

1 **Supplemental Table 8. Univariate and multivariate analysis of Overall Survival (OS) for**  
 2 **EV-mediated *ELNATI* expression in BCa patients (*n* = 242)**

| Variables                                           | Univariate analysis |             |                              | Multivariate analysis |             |                              |
|-----------------------------------------------------|---------------------|-------------|------------------------------|-----------------------|-------------|------------------------------|
|                                                     | HR                  | 95%CI       | <i>P</i> -value <sup>i</sup> | HR                    | 95%CI       | <i>P</i> -value <sup>i</sup> |
| Age (<65 vs. ≥65)                                   | 0.83                | 0.569-1.214 | 0.339                        |                       |             |                              |
| Gender (Male vs. Female)                            | 1.12                | 0.726-1.730 | 0.605                        |                       |             |                              |
| T stage (T2-4 vs. T1)                               | 1.27                | 0.847-1.913 | 0.245                        |                       |             |                              |
| T grade (High vs. Low)                              | 0.85                | 0.565-1.297 | 0.463                        |                       |             |                              |
| Lymphatic metastasis (positive vs. negative)        | 1.58                | 1.029-2.428 | <b>0.037*</b>                | 1.22                  | 0.783-1.916 | 0.375                        |
| EV-mediated <i>ELNATI</i> expression (High vs. Low) | 2.16                | 1.475-3.183 | <b>0.001*</b>                | 2.06                  | 1.383-3.083 | <b>0.001*</b>                |

3 Abbreviations: HR = hazard ratio; 95%CI =95% confidence interval; T stage = tumor stage;

4 T grade = tumor grade. <sup>i</sup> Cox regression analysis, \* *P* <0.05, \*\* *P* <0.01.

5

1 **Supplemental Table 9. Univariate and multivariate analysis of Disease-Free Survival**  
 2 **(DFS) for EV-mediated *ELNATI* expression in BCa patients (*n* = 242)**

| Variables                                           | Univariate analysis |             |                              | Multivariate analysis |             |                              |
|-----------------------------------------------------|---------------------|-------------|------------------------------|-----------------------|-------------|------------------------------|
|                                                     | HR                  | 95%CI       | <i>P</i> -value <sup>i</sup> | HR                    | 95%CI       | <i>P</i> -value <sup>i</sup> |
| Age (<65 vs. ≥65)                                   | 0.849               | 0.600-1.201 | 0.356                        |                       |             |                              |
| Gender (Male vs. Female)                            | 1.072               | 0.723-1.590 | 0.728                        |                       |             |                              |
| T stage (T2-4 vs. T1)                               | 1.265               | 0.872-1.835 | 0.215                        |                       |             |                              |
| T grade (High vs. Low)                              | 0.921               | 0.628-1.351 | 0.673                        |                       |             |                              |
| Lymphatic metastasis (positive vs. negative)        | 1.843               | 1.270-2.675 | <b>0.001</b> **              | 1.412                 | 0.941-2.118 | 0.095                        |
| EV-mediated <i>ELNATI</i> expression (High vs. Low) | 1.879               | 1.329-2.656 | <b>0.001</b> **              | 1.728                 | 1.203-2.484 | <b>0.003</b> **              |

3 Abbreviations: HR = hazard ratio; 95%CI = 95% confidence interval; T stage = tumor stage;  
 4 T grade = tumor grade. <sup>i</sup>Cox regression analysis, \* *P* < 0.05, \*\* *P* < 0.01.

5  
 6

1 **Supplemental Table 10. Diagnostic performance of EV-mediated *ELNATI* expression,**  
 2 **urine cytology and FISH analysis of urinary samples in BCa patients and controls**

| Methods                                   | BCa (n=242) vs. controls<br>(n=166) |                        |                     | LN positive (n=50) vs. LN<br>negative (n=192) |                        |                     |
|-------------------------------------------|-------------------------------------|------------------------|---------------------|-----------------------------------------------|------------------------|---------------------|
|                                           | Sensitivity<br>(95%CI)              | Specificity<br>(95%CI) | Accuracy<br>(95%CI) | Sensitivity<br>(95%CI)                        | Specificity<br>(95%CI) | Accuracy<br>(95%CI) |
| EV-mediated<br><i>ELNATI</i> <sup>i</sup> | 0.85<br>(0.79-0.89)                 | 0.70<br>(0.63-0.77)    | 0.79<br>(0.75-0.83) | 0.72<br>(0.57-0.83)                           | 0.86<br>(0.81-0.91)    | 0.83<br>(0.78-0.88) |
| Urine cytology                            | 0.56<br>(0.49-0.62)                 | 0.98<br>(0.94-1.00)    | 0.73<br>(0.68-0.77) | 0.76<br>(0.62-0.86)                           | 0.08<br>(0.05-0.13)    | 0.22<br>(0.17-0.28) |
| FISH                                      | 0.88<br>(0.84-0.92)                 | 0.6<br>(0.52-0.67)     | 0.77<br>(0.73-0.81) | 0.54<br>(0.39-0.68)                           | 0.28<br>(0.22-0.33)    | 0.43<br>(0.37-0.49) |

3 <sup>i</sup> Sensitivity and specificity by EV-mediated *ELNATI* were obtained at the best cutoffs.

4  
5

1 **Supplemental Table 11. The assessment of LN status by urinary EV-mediated *ELNATI***  
 2 **expression compared with CT in BCa patients (*n* = 242)**

| Pathologi<br>cal LN<br>status | EV-mediated<br><i>ELNATI</i> -reported LN (+) <sup>i</sup> |                        |       | EV-mediated<br><i>ELNATI</i> -reported LN (-) |                        |       | Total |
|-------------------------------|------------------------------------------------------------|------------------------|-------|-----------------------------------------------|------------------------|-------|-------|
|                               | CT-report<br>ed LN (+)                                     | CT-report<br>ed LN (-) | Total | CT-report<br>ed LN (+)                        | CT-report<br>ed LN (-) | Total |       |
|                               | LN (+)                                                     | 17                     | 19    | 36                                            | 2                      | 12    |       |
| LN (-)                        | 6                                                          | 20                     | 26    | 10                                            | 156                    | 166   | 192   |
| <b>Total</b>                  | 23                                                         | 39                     | 62    | 12                                            | 168                    | 180   | 242   |

3 Abbreviations: LN (+) = lymph node positive; LN (-) = lymph node negative.<sup>i</sup>The best cut  
 4 off of urinary EV-mediated *ELNATI* was used to distinguish LN-positive and LN-negative  
 5 BCa.  
 6  
 7

1 **Supplemental Table 12. Primer and probes used in the experiments.**

| <b>Gene</b>   | <b>Sequence (5'-3')</b>                            | <b>Application</b> |
|---------------|----------------------------------------------------|--------------------|
| <i>ELNAT1</i> | F: TGGCAAGAGACTTCCTGAGG<br>R: CAGAATGCCATGGTTTCCCC | qRT-PCR            |
| PROX1         | F: CAGCCCGAAAAGAACAGAAG<br>R: GGGTCTAGCTCGCACATCTC | qRT-PCR            |
| U6            | F: CTCGCTTCGGCAGCACA<br>R: AACGCTTCACGAATTTGCGT    | qRT-PCR            |
| 18S rRNA      | F: ACACGGACAGGATTGACAGA<br>R: GGACATCTAAGGGCATCACA | qRT-PCR            |
| MALAT1        | F: GCAGGGAGAATTGCGTCATT<br>R: TTCTTCGCCTTCCCCGTA   | qRT-PCR            |
| SUMO1         | F: ATCAAGCCTCAGTCCCCTTC<br>R: TGCTAGAACATCAGGGCCAA | qRT-PCR            |
| SUMO2         | F: GACGAAAAGCCCAAGGAAGG<br>R: CATTGATTGGTTGCCCGTCA | qRT-PCR            |
| SUMO3         | F: GCAAGCTGATGAAGGCCTAC<br>R: TCAACAGCAATGCGAGGATG | qRT-PCR            |
| SAE1          | F: GGTGGCTGTCTTTGTTCCAG<br>R: AGAAGGTGACAAGAGGCTCC | qRT-PCR            |
| UBA2          | F: GCTGCCCGAAACCATGTTAA<br>R: AGGAAAGGTTCTCTGGGTCG | qRT-PCR            |
| UBC9          | F: AATTCTTCGTCCTGAGGCCA<br>R: GCTTCCCATCTCTGTCCACT | qRT-PCR            |
| CCNB1IP1      | F: ACTGCCTGCTCTCACATCTT<br>R: TGTCCAACACGATCTCTGGT | qRT-PCR            |
| SENP6         | F: CACATGGACAGTCGCAAAGG<br>R: TGAAAGCGAGCACACAAACA | qRT-PCR            |
| SENP2         | F: ATTCCCATTCAGCTGACCA<br>R: AACCAAAGGAAGGCAGGACT  | qRT-PCR            |
| TRIM22        | F: GGAGGGGCAGAAGAGAGATG<br>R: ACATTCCTTGACCACCTCGT | qRT-PCR            |
| SENP7         | F: TCGTCTCACTGGTATCTCGC<br>R: TGGGAATCCTCTGCACTCAA | qRT-PCR            |
| SOX18         | F: AGAAGCGTCACTGTGGCAA<br>R: TTATTGTGGCCTCTCCGTCC  | qRT-PCR            |
| VEGF-C        | F: TGGGGAAGGAGTTTGGAGTC<br>R: GTTACTGGTTTGGGGCCTTG | qRT-PCR            |
| VEGF-D        | F: ACCTTCCATTCACACCAGCT<br>R: GACACCTGCCATTCCATGAC | qRT-PCR            |

---

|                       |                                                         |             |
|-----------------------|---------------------------------------------------------|-------------|
| NOTCH                 | F: GACCTCATCAACTCACACGC<br>R: GGTGTCTCCTCCCTGTTGTT      | qRT-PCR     |
| COUP-TFII             | F: CTGTCCCCACTCACTGTCTT<br>R: CCAACACACACACACCCAAA      | qRT-PCR     |
| FOXC1                 | F: TCTTCCTTGCCTCTCACCTG<br>R: ACACTTTCTGGCGTTTGGTC      | qRT-PCR     |
| MAFB                  | F: CTTCGACCTGCTCAAGTTCG<br>R: CCTCGAGGTGTGTCTTCTGT      | qRT-PCR     |
| GAPDH                 | F: CATGAGAAGTATGACAACAGCCT<br>R: AGTCCTTCCACGATACCAAAGT | ChIRP       |
| $\beta$ -actin        | F: GAAGCTAAGTCCTGCCCTCA<br>R: GGACGAGAGAAGACTGGAGG      | ChIP        |
| UBC9-P1               | F: TGAGTGAGGGAGGGAATGAA<br>R: GACAGTCCGTTCCGCCAAC       | ChIRP       |
| UBC9-P2               | F: TGAGTGAGTGAGGGTGGC<br>R: CTCCCCTACTCCGTCATTCC        | ChIRP       |
| UBC9-P3               | F: ATGAGTTTGTGAGAGTGGGA<br>R: CTCACTCTCACTCATTCCCG      | ChIRP       |
| UBC9-P4               | F: CATAGTGCCCGCAGATGG<br>R: CCCCAGAATCCAGTCCCTG         | ChIRP       |
| UBC9-P5               | F: GGGAGGGAATGAGTGAGGGA<br>R: AAATCATTCCTCCCTCACT       | ChIRP       |
| miR-196A              | F: GGTAGGTAGTTTCATGTTGTTGGG<br>R: Universal primer      | qRT-PCR     |
| miR-320               | F: GCAGAGAAAAGCTGGGTTGAG<br>R: Universal primer         | qRT-PCR     |
| miR-18A               | F: GATAGCAGCACAGAAATATTGGC<br>R: Universal primer       | qRT-PCR     |
| SOX18-P1              | F: CTTCTGAGAGGTTCGCGGG<br>R: CCAGATATAGCGGCTCAGGG       | ChIRP       |
| SOX18-P2              | F: GCAGCCTCCCCAGAACTT<br>R: AGAAAGGGCTGCTGATGAGG        | ChIRP       |
| SOX18-P3              | F: GGTTTGGGAGTGAGGACAGA<br>R: CAACAGCCGGTAAGTCCTTC      | ChIRP       |
| SOX18-P4              | F: AGGTCAGAGGGTCCAGGG<br>R: ACGGAGCCCACAAAGAGAAG        | ChIRP       |
| SOX18-P5              | F: AGGTGGCGAGATTCTGACC<br>R: CCCCTTCCTACTCCATCAGG       | ChIRP       |
| <i>ELNAT1</i> -sgRNA1 | AAAGGATCCTCTAGTAGCCA                                    | CRISPR/Cas9 |

---



|                       |                                                                   |                       |
|-----------------------|-------------------------------------------------------------------|-----------------------|
| <i>ELNAT1</i> -sgRNA2 | TCATCAAGACAGTAAATCCC                                              | CRISPR/Cas9           |
| <i>ELNAT1</i> 5'RACE  | TGACGGTAGTTTCCCAAGTTT                                             | Nested PCR<br>(Outer) |
| <i>ELNAT1</i> 5'RACE  | GCTTCACCTTGGCAACCTTA                                              | (Inner)               |
| <i>ELNAT1</i> 3'RACE  | AGTCTCAGGCCTTTAGTGATGA                                            | (Outer)               |
| <i>ELNAT1</i> 3'RACE  | ATGCCGTCTTGTGTTTCCTC                                              | (Inner)               |
| si-hnRNPA1#1          | sense: CAGCUGAGGAAGCUCUUCATT<br>antisense: UGAAGAGCUUCCUCAGCUGTT  | si-RNA                |
| si-hnRNPA1#2          | Mixed:<br>rCrArArCrUrUrCrGrGrUrCrGrUrGrGrArGrGrAdTdT              | si-RNA                |
| si-UBC9#1             | sense: GGGAUUGGUUUGGCAAGAATT<br>antisense: UUCUUGCCAAACCAAUCCCTT  | si-RNA                |
| si-UBC9#2             | sense: CAAUGAACCUGAUGAACUGTT<br>antisense: CAGUUCAUCAGGUUCAUUGTT  | si-RNA                |
| si- <i>ELNAT1</i> #1  | sense: CCAUGCGUUCUUUGGGCUUTT<br>antisense: UAACUGUCGAGUCCAUGCTT   | si-RNA                |
| si- <i>ELNAT1</i> #2  | sense: CCCAGUGUUGACUCACCAATT<br>antisense: UUGGUGAGUCAACACUGGGTT  | si-RNA                |
| si-SOX18#1            | sense: GCAAGAAGCAGGCGCGCAATT<br>antisense: UUGC GCGCCUGCUUCUUGCTT | si-RNA                |
| <i>ELNAT1</i> _odds1  | CATCATCACTAAAGGCCTGA 3'-Biotin labeled                            | ChIRP                 |
| <i>ELNAT1</i> _odds2  | CTTGCACTCCCATCGATTTG 3'-Biotin labeled                            | ChIRP                 |
| <i>ELNAT1</i> _odds3  | GTACTCCTCAACAGTCACAA 3'-Biotin labeled                            | ChIRP                 |
| <i>ELNAT1</i> _odds4  | GAGGCACATCAGTTACGTTG 3'-Biotin labeled                            | ChIRP                 |
| <i>ELNAT1</i> _even1  | GAACGCATGGCGATTACTTT 3'-Biotin labeled                            | ChIRP                 |
| <i>ELNAT1</i> _even2  | CTGGGTATTTTCTGACCACT 3'-Biotin labeled                            | ChIRP                 |
| <i>ELNAT1</i> _even3  | TACCTACTTGGGGAAACCAT 3'-Biotin labeled                            | ChIRP                 |
| <i>ELNAT1</i> _even4  | CACACAGCACTTAACCAAGC 3'-Biotin labeled                            | ChIRP                 |
| <i>ELNAT1</i>         | TGGCTTCTATGTCAACACGTA<br>5'-DIG labeled and 3'-DIG labeled        | ISH                   |
| U6                    | CACGAATTTGCGTGTATCCTT<br>5'-DIG labeled and 3'-DIG labeled        | ISH                   |
| Scramble              | GTGTAACACGTCTATACGCCCA<br>5'-DIG labeled and 3'-DIG labeled       | ISH                   |

1

2

## 1 **Supplemental Methods**

### 2 ***Electron microscopy analysis***

3 Transmission electron microscope was used to identify the characteristics of EVs. The  
4 isolated EVs were placed on the grid for 60 minutes and fixed with 2.5% glutaraldehyde for  
5 10 minutes. Subsequently, the EVs were incubated with uranyl acetate for another 5 minutes,  
6 followed by washing in PBS for three times. The grid was further imaged using a Hitachi  
7 transmission electron microscope.

### 8 ***Lentivirus infection and cell transfection***

9 To construct the *ELNATI* stable-overexpressing BCa cell lines, the lentivirus infection was  
10 conducted. Briefly, the *ELNATI* gene was cloned into the pCDH-CMV-MCS-EF1-Puro  
11 lentivirus vector which was further transfected into the HEK-293T cells. Then, the virus was  
12 harvested and used to infect the UM-UC-3 cells, followed by the selection of puromycin  
13 (Sigma Aldrich) for 2 weeks.

14 As for cell transfection,  $2 \times 10^5$  BCa cells per well were seeded into the 6-well plate and  
15 cultured for overnight. Then, the siRNAs or plasmids (Genepharma company, Shanghai,  
16 China) were transfected into the BCa cells with the assistance of lipofectamine 3000  
17 (Invitrogen) according to the manufacturer's instructions. qRT-PCR was used to detect the  
18 transfecting efficiency.

### 19 ***RACE***

20 To explore the full-length of *ELNATI*, the 5' and 3' RACE assays were conducted using

1 the 5'/3' RACE Kit (Roche, USA, Cat#3353621001) according to the manufacturer's  
2 protocols. The *ELNATI*-specific nested PCR primer sequences are listed in Supplemental  
3 Table 12. PCR amplification was done to acquire the gene specific RACE product, which was  
4 further purified in 1% agarose gel and subjected to bidirectional sequencing with specific  
5 primers.

### 6 ***RNA extraction and qRT-PCR assays***

7 According to the manufacturer's instructions, the TRIzol reagent from Life Technologies  
8 was used to extract the total RNAs from cells, tissues, and EVs, which were further reverse  
9 transcribed to cDNA using the Prime Script™ RT Master Mix (Takara, Japan,  
10 Cat#RR390B). We subsequently conducted the real-time PCR using TBGreen II (Takara,  
11 Japan, Cat#RR820A) to analyze the expression of target RNA. GAPDH was used as an  
12 internal reference and the  $2^{-\Delta\Delta CT}$  method was used to further analyze the data. All of the  
13 primer sequences are listed in Supplemental Table 12.

### 14 ***Western blotting analysis***

15 The cells were lysed in RIPA lysis buffer (Pierce, IL, USA) supplemented with protease  
16 inhibitor (Roche, CA, USA) for 30 minutes on ice, followed by the centrifugation at 4°C,  
17 12,000g for 30 minutes. The concentration of total proteins was counted using the BCA  
18 Protein Assay Kit (Thermo Fisher Scientific, MA, USA, Cat#23227) according to the  
19 manufacturer's instructions. Subsequently, the proteins, after heating denaturation,  
20 were separated by electrophoresis in 10% SDS polyacrylamide gels (SDS-PAGE), which was  
21 further transferred into the polyvinylidene fluoride membrane. The membrane was blocked

1 with 5% BSA for 1 hour at room temperature and incubated with primary antibodies at 4°C  
2 overnight. After washing three times with TBST, the membrane was incubated with a specific  
3 HRP-conjugated secondary antibody for 1 hour at room temperature, which was further  
4 detected through the ECL reagents according to the manufacturer's instructions.

## 5 ***FISH***

6 The BCa cells were seeded into a confocal plate. After overnight incubation, the cells were  
7 fixed in 4% paraformaldehyde and permeabilized in 0.5% Triton X-100. Subsequently, the  
8 Alexa Fluor 555-labeled *ELNATI* probes (Invitrogen, CA, USA) were added to hybridize  
9 with the BCa cells at 37°C overnight. DAPI was used to stain the cell nuclei and the Zeiss  
10 LAM 710 focal Microscope (Carl Zeiss AG, Germany) was used to capture images for  
11 further analysis.

## 12 ***Immunofluorescence***

13 To perform the immunofluorescence assays,  $3 \times 10^4$  BCa cells were seeded into the  
14 confocal plate and cultured for overnight. The cells were fixed in 4% formaldehyde for 15  
15 minutes followed by permeabilization with 0.1% Triton X-100 for 20 minutes. Subsequently,  
16 goat serum was used to block the cells for 30 minutes and the primary antibody was added to  
17 incubate at 4°C for overnight. The cells were further incubated with the secondary antibody  
18 in darkness at room temperature for 1 hour, followed by the nuclei staining with DAPI. The  
19 LSM710 confocal microscope (Zeiss, Pleasanton, CA, USA) was used to capture the images.

## 1 ***Nuclear fractionation***

2 To detect the subcellular location of *ELNATI*, nuclear fractionation assays were performed  
3 according to the instructions of the PARIS Kit (Thermo Fisher, MA, USA, Cat#AM1921).  $1$   
4  $\times 10^6$  BCa cells were harvested and lysed in an ice-cold cell fractionation buffer for 10  
5 minutes, followed by centrifugation at 500g for 5 minutes at 4°C to separate the cytoplasm  
6 and nucleus fraction. The acquired products were added to TRIzol reagent to extract the  
7 RNAs, respectively.

## 8 ***Tube formation assays***

9 The FBS-free ECM and Matrigel (BD Biosciences, CA, USA) were mixed at a 2:1 ratio  
10 and coated into the 24-well chambers followed by incubation at 37°C overnight.  
11 Subsequently,  $1 \times 10^5$  pre-treated HLECs per well were seeded into the Matrigel chambers  
12 and the equivalent PBS and isolated EVs were added into the chambers. Tube formation was  
13 observed using the inverted fluorescence microscope. The length of tubes was analyzed by  
14 ImageJ software.

## 15 ***Transwell assays***

16  $1 \times 10^5$  pre-treated HLECs resuspended in 200  $\mu$ L FBS-free culture media were seeded into  
17 the upper chamber of Transwell insert (8  $\mu$ m, Corning Costar Corp, USA). Subsequently, a  
18 total of 700  $\mu$ L culture media containing 5% FBS was added to the lower chamber. After  
19 treating with the equivalent PBS or isolated EVs in the upper chamber, the HLECs were  
20 cultured for 15 hours. Then the cells were fixed with methanol and stained with 0.1% crystal  
21 violet for 15 minutes. The inverted fluorescence microscope was used to capture the image.

## 1 ***ChIP assays***

2 ChIP assays were performed using the EZ-Magna ChIP A/G Kit (Millipore, MA, USA,  
3 Cat#17-408). BCa cells or HLECs treated with 10 µg/ml indicated EVs were harvested and  
4 fixed in 1% formaldehyde for 10 minutes, followed by the incubation of 10 × glycine for 5  
5 minutes at room temperature. Subsequently, the cell lysis buffer supplemented with protease  
6 inhibitor was added to lyse the fixed cells, and the cell lysate was further sonicated into short  
7 fragments between 100 bp and 200 bp. The sheared chromatin was immunoprecipitated with  
8 the target antibody at 4°C overnight. The cross-linking DNA was eluted and analyzed by  
9 qRT-PCR.

## 10 ***IP and co-IP assays***

11 IP and co-IP assays were performed using the co-Immunoprecipitation Kit (Thermo Fisher,  
12 MA, USA, Cat#26149). Briefly, BCa cells were lysed in the lysis buffer followed by the  
13 immunoprecipitation with an amine-reactive resin pre-coupled with target antibodies, and the  
14 normal rabbit IgG as a negative control, at 4°C overnight. The proteins were eluted to be  
15 further analyzed by mass spectrometry and western blot analysis.

## 16 ***CRISPR/Cas9-mediated gene deletion***

17 Single guide RNAs (sgRNAs) targeted *ELNAT1* were designed, respectively, and inserted  
18 into lentiCRISPR v2 plasmid. The constructed plasmids were stably transfected into the cells  
19 to knockout the expression of *ELNAT1*. The individually cloned cells were further analyzed  
20 through qRT-PCR to determine the knockout efficiency.

## 1 ***RIP assays***

2 The EZ-Magna RIP Kit (Millipore, MA, USA, Cat#17-700) was used for RIP assays.  
3  $2 \times 10^7$  BCa cells were harvested and lysed in the lysis buffer. The anti-hnRNPA1 antibody or  
4 rabbit IgG as the negative control pretreated magnetic beads were incubated with the lysate to  
5 acquire the immunoprecipitate. qRT-PCR analysis was performed to determine the  
6 precipitated RNAs, and U1 was used as a non-specific control.

## 7 ***Serial deletion analysis***

8 Serial deletion analysis was conducted to detect the fragment of *ELNATI* contributed to its  
9 direct interaction with hnRNPA1. The various truncated *ELNATI* sequences were cloned into  
10 the pGSI vector and further used in the RNA pulldown assays as previously described.

## 11 ***Dual-luciferase reporter assays***

12 The dual-luciferase reporter assays were performed to detect the epigenetic regulation of  
13 *ELNATI* on the promoter of *UBC9* and *SOX18*. Briefly, we constructed the pGL3 reporter  
14 plasmids by inserting different fragments of *UBC9* and *SOX18* promoter into the upstream of  
15 the promoter region of the luciferase gene. Subsequently, the constructed pGL3 plasmids  
16 were transfected into HLECs pre-seeded into a 6-well plate and incubated for 48 hours. The  
17 cells were harvested and completely lysed in the lysis buffer, followed by the detection of  
18 firefly and renilla fluorescence through the Dual-Luciferase Reporter Assay System (Promega,  
19 USA, Cat#E1910).

1 ***FRET and CD spectroscopy***

2 For FRET assays, we labeled the TFO with 5-carboxytetramethylrhodamine (TAMRA) and  
3 the TTS with 5-carboxyfluorescein (FAM), both of which were added into the binding buffer  
4 with a ratio of 1:5. After incubation at 55°C for 10 minutes and 37°C for 10 hours, the  
5 Molecular Device M5 Plate Reader was used to detect the 480 and 690 nm fluorescence  
6 wavelengths in different groups.

7 For CD spectroscopy, the equilibration of the mixture of TFO (2.2  $\mu$ M) and TTS oligos  
8 (2.2  $\mu$ M) with a ratio of 1:1 was conducted in the binding buffer at 30°C for 1 hour. Then the  
9 Chirascan spectrometer (Applied Photophysics) was used to measure fluorescence  
10 wavelengths. The Control ssRNA/TTS was used as the negative control while the *FENDRR*  
11 TFO/*PITX2* TTS as the positive control. The oligos for CD spectroscopy and FRET analysis  
12 are summarized in Supplemental Table 5.

13
